# Supplementary material for: Anomalously polarised emission from a MoS2/WS2heterostructure
Source: Royal Society of Chemistry journal article supplement (doi:10.1039/d1na00462j), 2021-01-01
Supplement: d1na00462j1.pdf [file d1na00462j1.pdf]

## Anomalous polarised emission from MoS<sub>2</sub>/WS<sub>2</sub> heterostructure

P Riya Mol, Prahalad Kanti Barman, Prasad V Sarma, Abhishek S Kumar, Satyam Sahu,  
Manikoth M Shaijumon and Rajeev N Kini\*

Indian Institute of Science Education and Research Thiruvananthapuram (IISER TVM),  
Maruthamala P.O. Vithura, Kerala 695551, India

### Supplementary Information

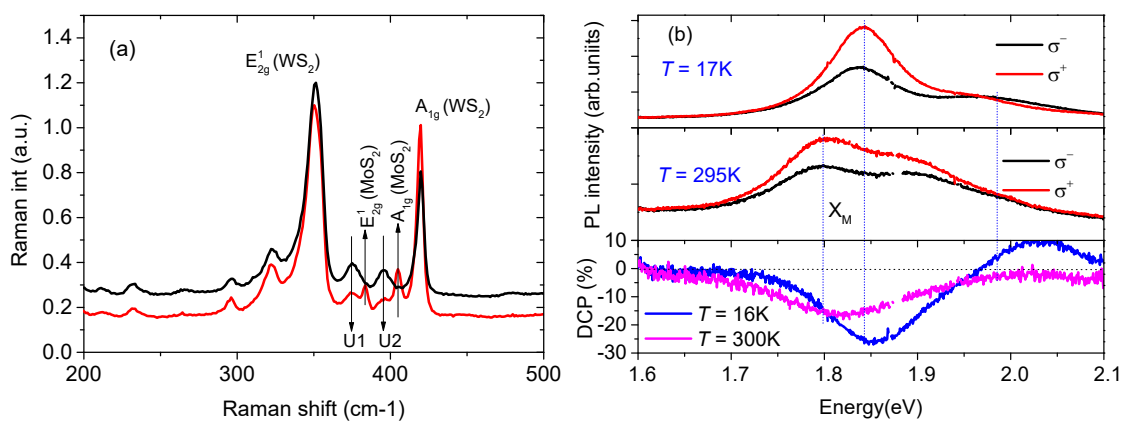

**Figure S1.** (a) Normalized Raman signal from the top (red) and edge (black) of the HS sample. (b) Helicity resolved PL spectra obtained from the MoS<sub>2</sub>/WS<sub>2</sub> HS with 532 nm, circularly polarized (σ) excitation at T = 17 K (top panel) and T = 295 K (middle panel). Degree of polarization (DCP) at T = 17 K and T = 295 K (Bottom panel) obtained with σ excitation of the MoS<sub>2</sub>/WS<sub>2</sub> HS with 532 nm light.

\* rajeevkini@iisertvm.ac.in

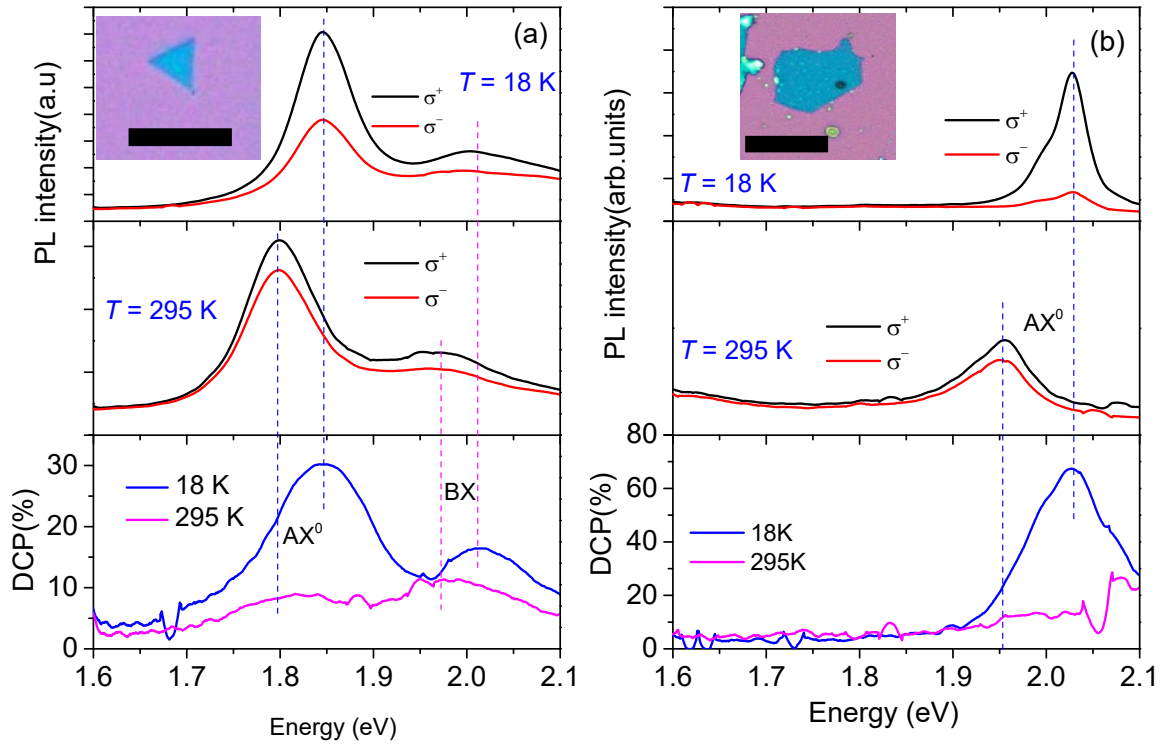

**Figure S2.** (a) Helicity resolved PL spectra obtained from the ML MoS<sub>2</sub> with 532 nm, circularly polarized ( $\sigma^+$ ) excitation at  $T = 18$  K (top panel) and  $T = 295$  K (middle panel) and the corresponding degree of polarization (DCP) (Bottom panel). (b) Data, same as in (a), obtained for the 3L WS<sub>2</sub> sample. The insets of the top panels show the optical images of the flakes. The scale bar is 10  $\mu$ m.

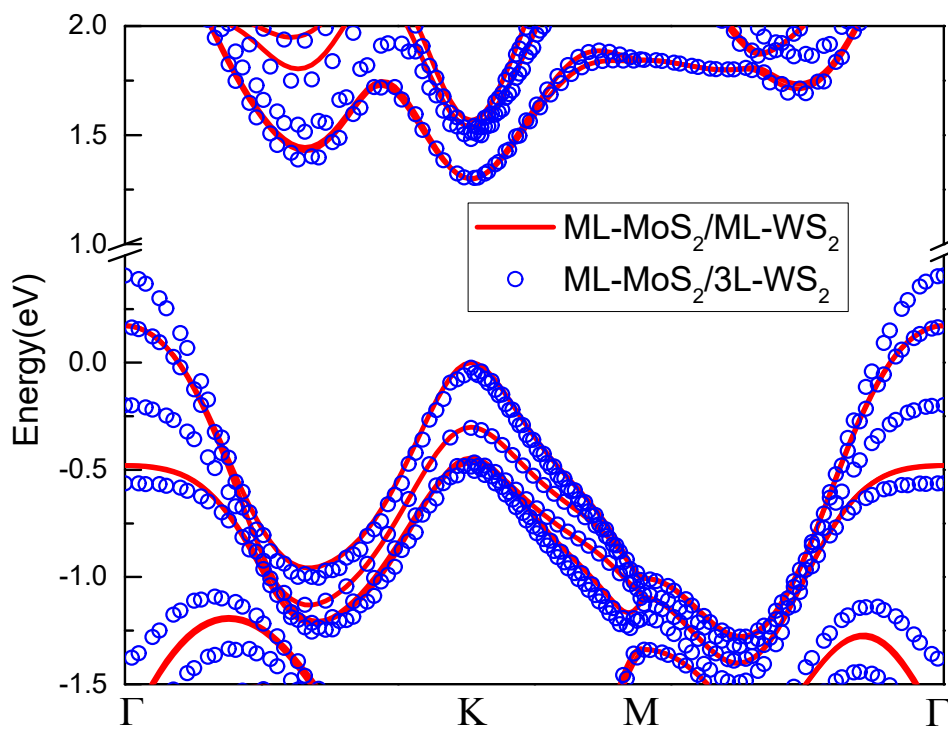

**Figure S3.** Calculated band structure of heterostructures with ML MoS<sub>2</sub>-ML WS<sub>2</sub> (red line) and ML MoS<sub>2</sub>-3L WS<sub>2</sub> (blue open symbols).

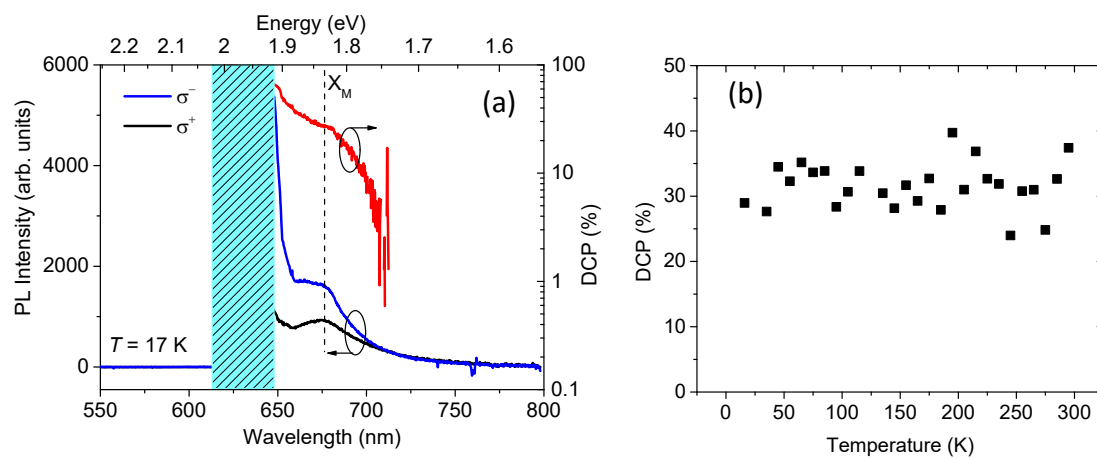

**Figure S4.** (a) Helicity resolved PL spectra and degree of polarization (DCP) obtained from the MoS<sub>2</sub>/WS<sub>2</sub> HS with 633 nm, circularly polarized ( $\sigma^-$ ) excitation at  $T = 17$  K. The shaded blue region indicated the stopband of the filter used to block the laser light from reaching the detector. (b) DCP near the  $X_M$  obtained from the HS with 633 nm excitation as a function of temperature.

### Supplementary Note 1:

Fully relativistic calculations within the density functional theory (DFT) were employed using the Quantum-ESPRESSO package. [1] The calculations were performed with the projector-augmented wave (PAW) scheme.[2]The Perdew-Burke-Ernzerhof (PBE) [3] parameterization of the generalized gradient approximation (GGA) was used for the exchange-correlation potentials with a plane-wave cutoff of 400 eV and a  $12 \times 12 \times 1$   $k$ -point mesh. The van der Waals interactions were taken into account through the DFT-D2 dispersion correction.[4][5] The spin-orbit interaction was also included in the calculation. A vacuum of 20 Å thickness was added in the vertical direction to avoid spurious interactions between adjacent slabs. The structural optimization was continued until the residual forces have converged to less than  $2.57 \times 10^{-2}$  eV/Å and the total energy to less than  $1.36 \times 10^{-3}$  eV.

### Supplementary References:

- [1] Giannozzi P, Baroni S, Bonini N, Calandra M, Car R, Cavazzoni C, Ceresoli D, Chiarotti G L, Cococcioni M, Dabo I, Dal Corso A, De Gironcoli S, Fabris S, Fratesi G, Gebauer R, Gerstmann U, Gougoussis C, Kokalj A, Lazzeri M, Martin-Samos L, Marzari N, Mauri F, Mazzarello R, Paolini S, Pasquarello A, Paulatto L, Sbraccia C, Scandolo S, Sclauzero G, Seitsonen A P, Smogunov A, Umari P and Wentzcovitch R M 2009 QUANTUM ESPRESSO: A modular and open-source software project for quantum simulations of materials *J. Phys. Condens. Matter* **21** 395502
- [2] Kresse G and Joubert D 1999 From ultrasoft pseudopotentials to the projector augmented-wave method *Phys. Rev. B* **59** 1758–75
- [3] Perdew J P, Burke K and Ernzerhof M 1996 Generalized Gradient Approximation Made Simple *Phys. Rev. Lett.* **77** 3865–8
- [4] Grimme S 2006 Semiempirical GGA-type density functional constructed with a long-range dispersion correction *J. Comput. Chem.* **27** 1787–99
- [5] Barone V, Casarin M, Forrer D, Pavone M, Sambi M and Vittadini A 2009 Role and effective treatment of dispersive forces in materials: Polyethylene and graphite crystals as test cases *J. Comput. Chem.* **30** 934–9
